# Supplementary material
Source: publisher figshare collection journal article supplement (https://asha.figshare.com/articles/dataset/_/27048328)
Supplement: Supplementary file 1 [file 1]

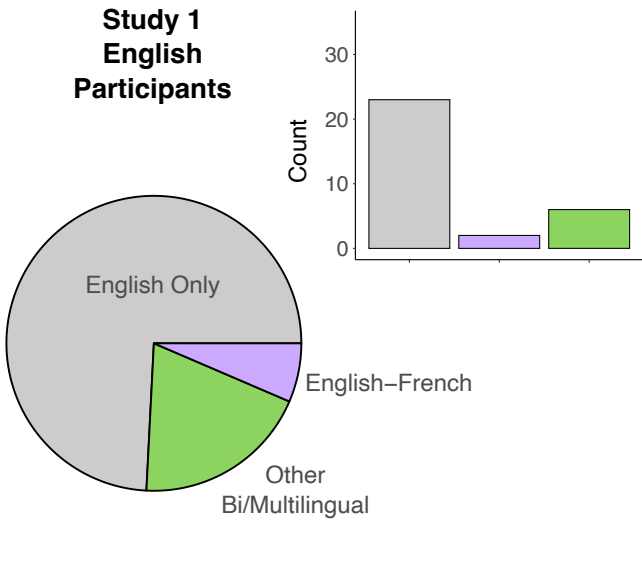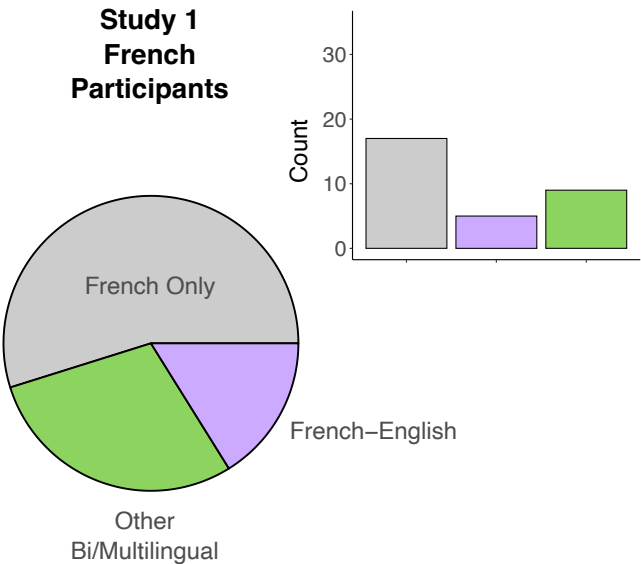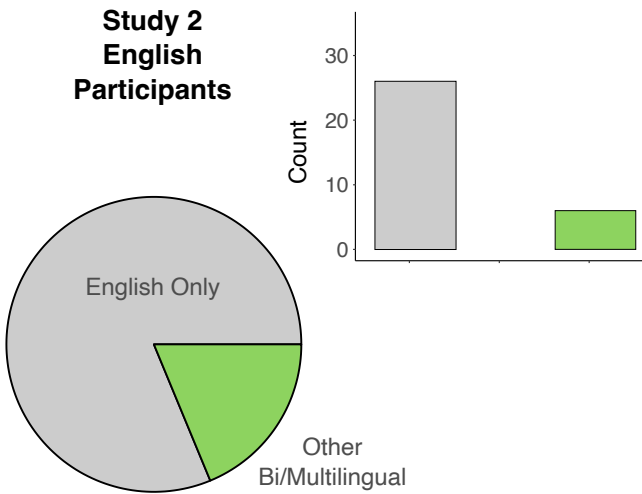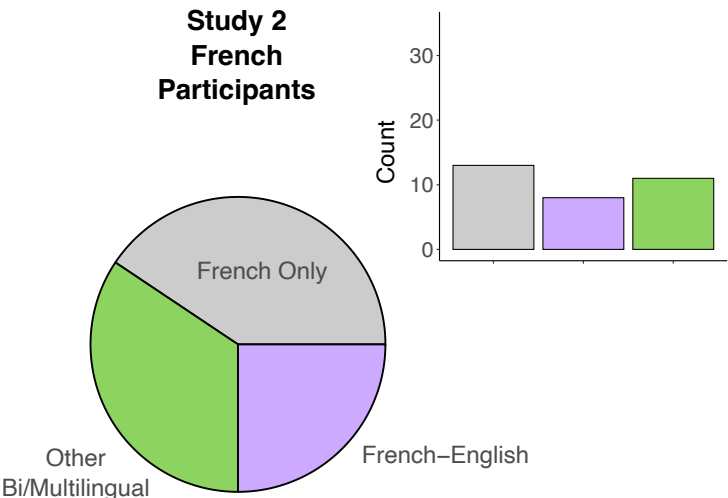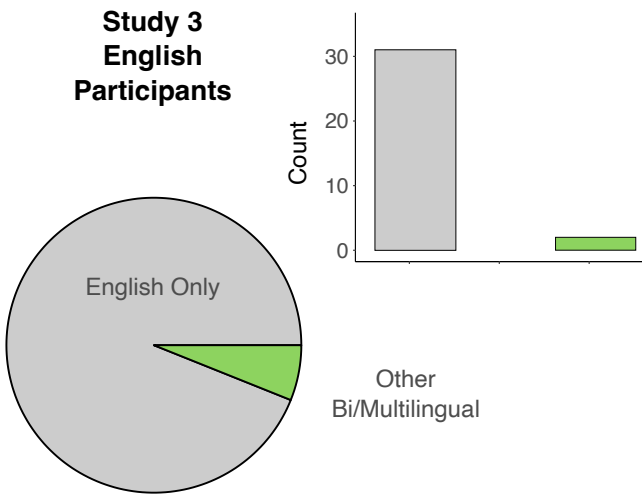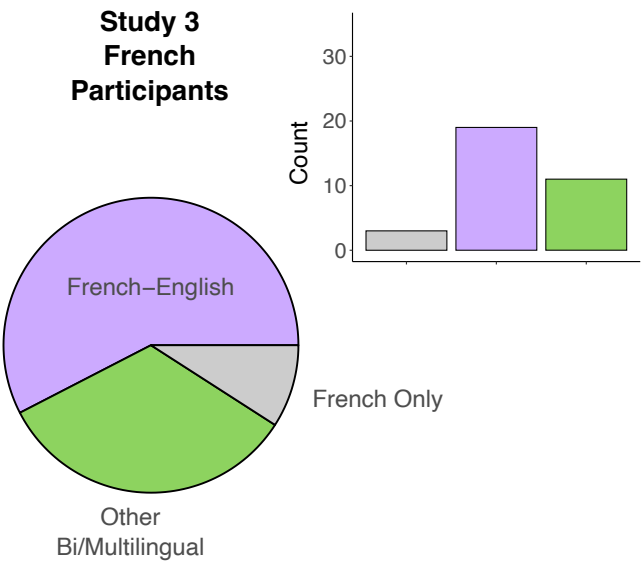

**Supplemental Material S2.** Distribution of fluency in other languages (than the first language used exclusively in testing) by the two groups of participants in each experiment. The French-speaking group was more bilingual than the English-speaking group, especially in Experiment 3.
